# Supplementary material for: Extremely selective detection of ppb levels of indoor xylene using CoCr2O4 hollow spheres activated by Pt doping
Source: Royal Society of Chemistry journal article supplement (doi:10.1039/c8cc08186g), 2018-11-30
Supplement: c8cc08186g1.pdf [file c8cc08186g1.pdf]

## Supporting information for

### “Extremely selective detection of ppb-levels indoor xylene using CoCr<sub>2</sub>O<sub>4</sub> hollow spheres activated by Pt doping”

Kun Ho Lee,<sup>a</sup> Bo-Young Kim,<sup>a</sup> Ji-Wook Yoon,<sup>a,\*</sup> and Jong-Heun Lee<sup>a,\*</sup>

<sup>a</sup>Department of Materials Science and Engineering, Korea University, Seoul 02841, Korea

\* Authors to whom correspondence should be addressed

Ji-Wook Yoon: uhpupu@korea.ac.kr, Tel: +82-23290-3710

Jong-Heun Lee: jongheun@korea.ac.kr, Tel: +82-2-3290-3282

## Experimental Section

### Preparation of pure, Pt-, Au-, and Pd-CoCr<sub>2</sub>O<sub>4</sub> hollow spheres:

Pure CoCr<sub>2</sub>O<sub>4</sub> hollow spheres were prepared by one-pot ultrasonic spray pyrolysis of an aqueous solution (200 mL) containing Cobalt (II) nitrate hexahydrate (0.375 g, Co(NO<sub>3</sub>)<sub>2</sub>·6H<sub>2</sub>O, >98%, Sigma-Aldrich, UK), Chromium (III) nitrate nonahydrate (1.020 g, Cr(NO<sub>3</sub>)<sub>3</sub>·9H<sub>2</sub>O, >99.99%, Sigma-Aldrich, USA), and citric acid (1.005 g, C<sub>6</sub>H<sub>8</sub>O<sub>7</sub>, 99.5%, Sigma-Aldrich, Japan). The spray-pyrolysis equipment consisted of the droplet generator, tubular reactor, and powder-collecting chamber. The droplets of the solution were generated by five ultrasonic transducers (frequency = 1.67 MHz), which were carried into a tubular quartz reactor (temperature = 600 °C, length = 1200 mm, diameter = 50 mm) by air at a flow rate of 10 L/min. A Teflon bag filter was used to collect the precursor powders. The CoCr<sub>2</sub>O<sub>4</sub> hollow spheres were prepared by annealing the precursor powders at 700 °C for 2 h in air.

The Pt-, Au-, and Pd-CoCr<sub>2</sub>O<sub>4</sub> hollow spheres were synthesized by the same procedure after the addition of chloroplatinic acid solution, 8 wt% in H<sub>2</sub>O (0.015 mL, H<sub>2</sub>PtCl<sub>6</sub>, Sigma-Aldrich, USA), palladium nitrate hydrate (0.0014 g, Pd(NO<sub>3</sub>)<sub>2</sub>·xH<sub>2</sub>O, Sigma-Aldrich, USA), and gold chloride trihydrate (0.0012 g, HAuCl<sub>4</sub>·3H<sub>2</sub>O, Sigma-Aldrich, USA) in the solution, respectively. The ratio between Pt, Au, and Au and Co and Cr ([Pt, Au, or Au]/[Co + 2Cr]) were fixed to 0.3 wt%. The Pt-, Au-, and Pd-CoCr<sub>2</sub>O<sub>4</sub> spheres were prepared by the heat-treatment of the precursor powders at 700 °C for 2 h in air.

### **Characterization:**

The morphologies of the sensing materials were investigated by using field emission scanning electron microscopy (SEM, SU-70, Hitachi Co., Ltd., Japan) and high-resolution transmission electron microscopy (HR-TEM, JEM-2100F, JEOL, Japan). The phases and crystal structures were analyzed via X-ray diffractometry (XRD, D/MAX-2500, Rigaku, Japan) with  $\text{CuK}\alpha$  radiation ( $\lambda = 1.5418 \text{ \AA}$ ). The chemical states of each sample were observed using X-ray photoelectron spectroscopy (XPS, MultiLab 2000, Thermo Scientific, USA). Inductively coupled plasma-atomic emission spectroscopy (ICP-AES, Optima 4300 DV, Perkin Elmer Instruments, USA) was used to determine the concentration of Pt, Au, and Pd in the  $\text{CoCr}_2\text{O}_4$  hollow spheres. The specific surface areas of the spheres were determined from a Brunauer–Emmett–Teller (BET) analysis of nitrogen-adsorption measurements (BET, TriStar 3000, Micromeritics, Norcross, MN, USA).

### **Gas sensing characteristics:**

The pure, Pt-, Au-, and Pd- $\text{CoCr}_2\text{O}_4$  hollow spheres were made in a slurry form and drop-coated on an alumina substrate (size:  $1.5 \times 1.5 \text{ mm}^2$ , thickness: 0.25 mm) with two Au electrodes on the top (spacing: 200  $\mu\text{m}$ ) and a micro-heater on the bottom. The sensors were heat-treated at 450°C for 2 h to remove residual water-related species (e.g., hydroxyl groups) and to stabilize the sensors. For the measurement, the sensors were contained in a specially designed, low volume ( $1.5 \text{ cm}^3$ ) quartz tube to minimize delay in changing the atmosphere controlled by a four-way valve. The flow rates for both dry air and analytic gases were  $200 \text{ cm}^3 \text{ min}^{-1}$ . The concentration of analytic gases was controlled by changing the mixing ratio between 5 ppm of *p*-xylene, toluene, ethanol, trimethylamine, ammonia, formaldehyde, benzene, and carbon monoxide (in air balance) and synthetic dry air. The direct-current 2-probe resistance of the sensor was measured using an electrometer (6487 Picoammeter, Keithley, Tecktronic Inc., USA) interfaced with a computer. The gas responses ( $S = R_g R_a^{-1}$ ;  $R_g$ : resistance in analytic gas,  $R_a$ : resistance in air) of the sensors were evaluated in the range of 250 – 350°C.

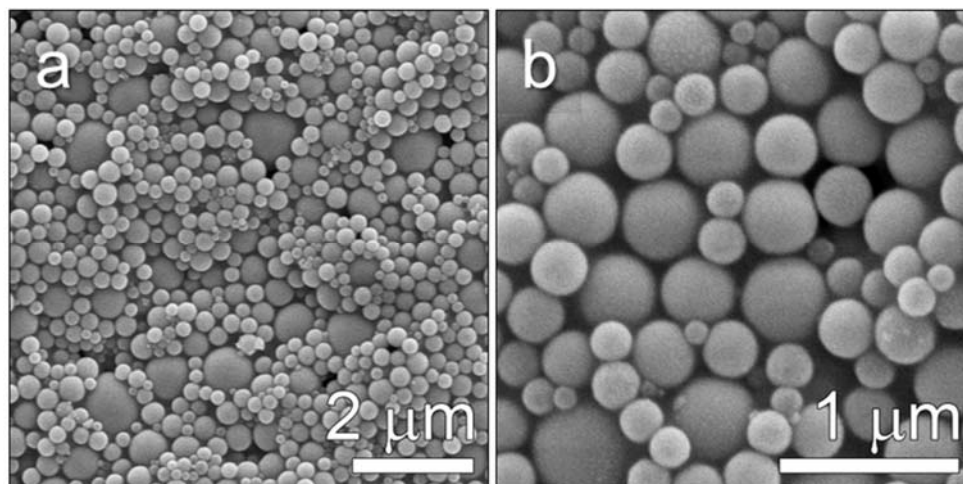

Figure S1. (a) Low and (b) high magnification SEM images for Pt-CoCr precursor spheres after spray pyrolysis.

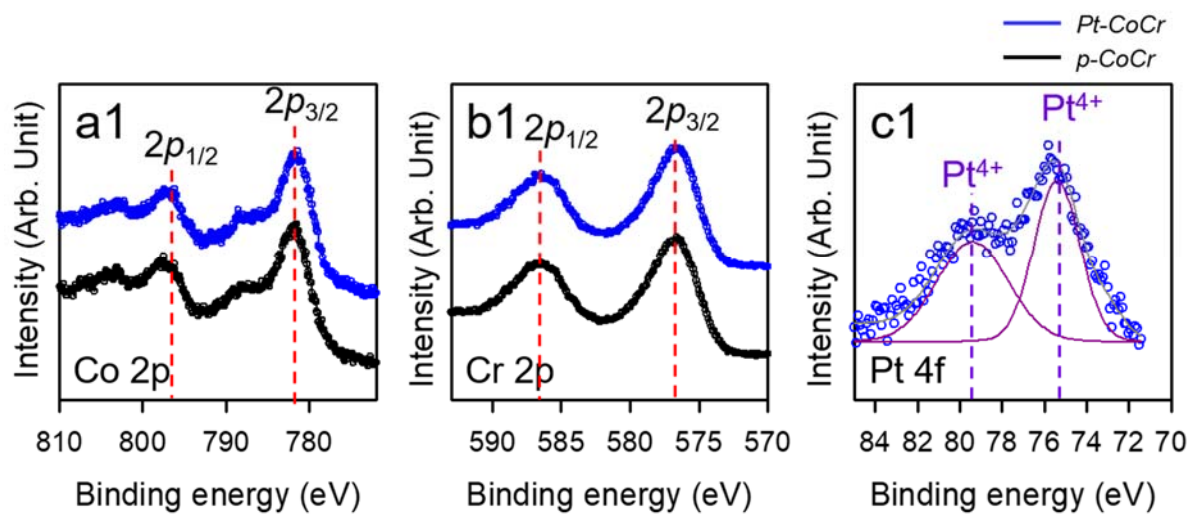

Figure S2. XPS spectra for (a) Co 2p, (b) Cr 2p, and (c) Pt 4f of Pt-CoCr (blue) and p-CoCr (black).

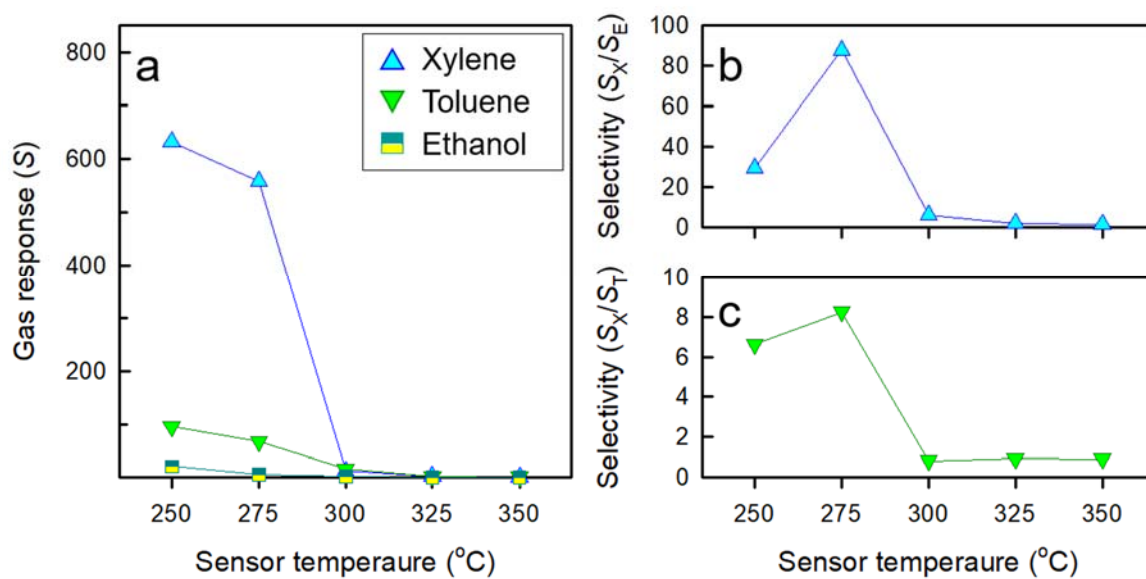

Figure S3. (a) Gas responses of Pt-CoCr to 5 ppm of xylene, toluene, and ethanol at 250 – 350 °C. (b, c) Xylene selectivity ( $S_X/S_E$  or  $S_X/S_T$ ) at the same temperatures.

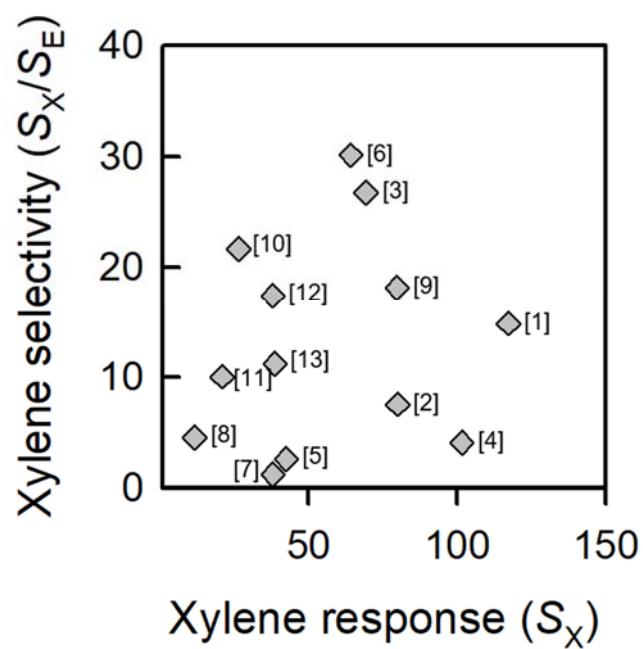

Figure S4. The xylene selectivity ( $S_X/S_E$ ) and response ( $S_X$ ) reported in the literature.<sup>1-13</sup>

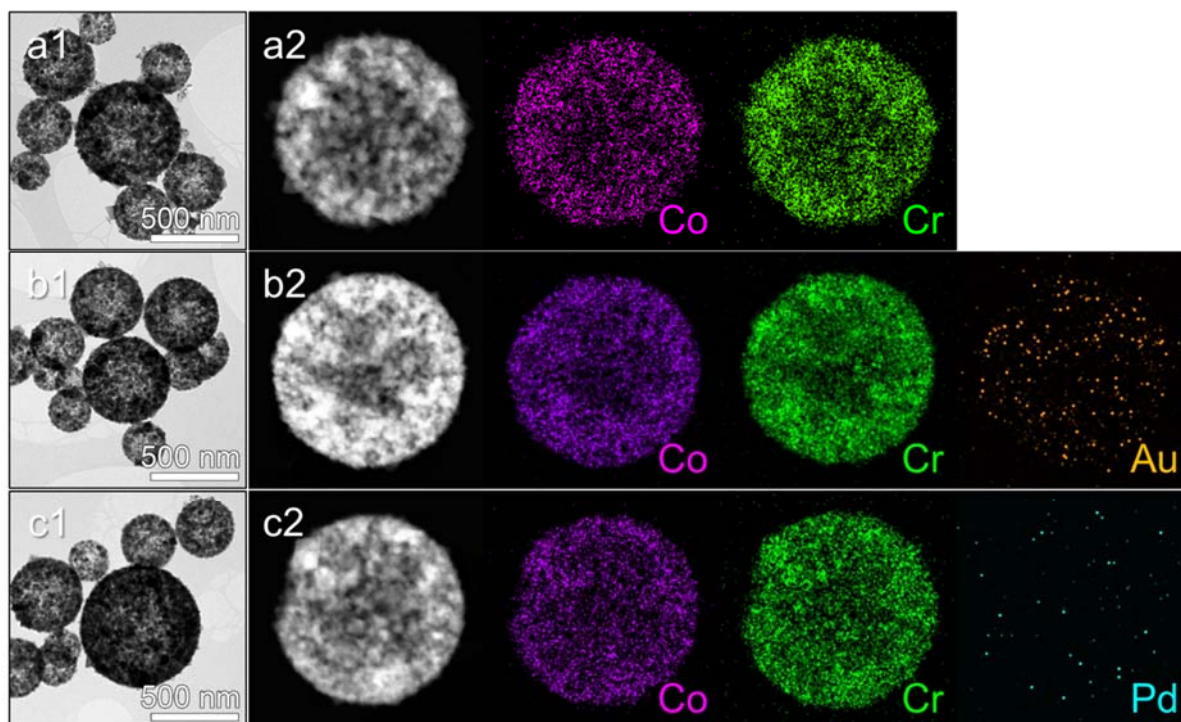

Figure S5. (a1-c1) TEM and (a2-c2) elemental-mapping images of (a) p-CoCr, (b) Au-CoCr, and (c) Pd-CoCr.

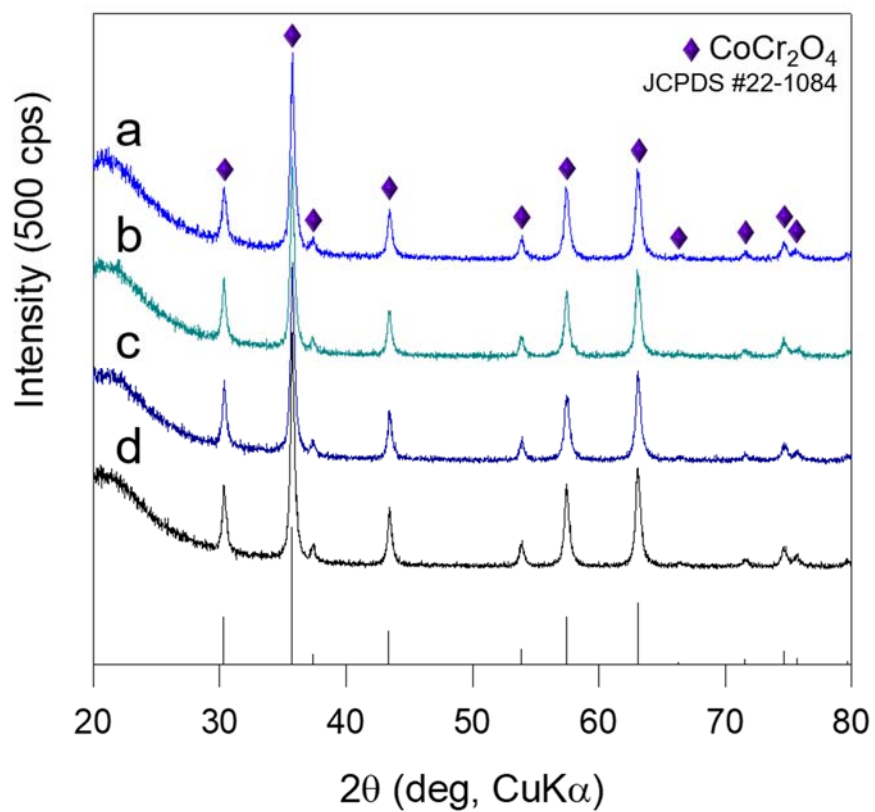

Figure S6. XRD patterns of (a) Pt-CoCr, (b) Au-CoCr, (c) Pd-CoCr, and (d) p-CoCr.



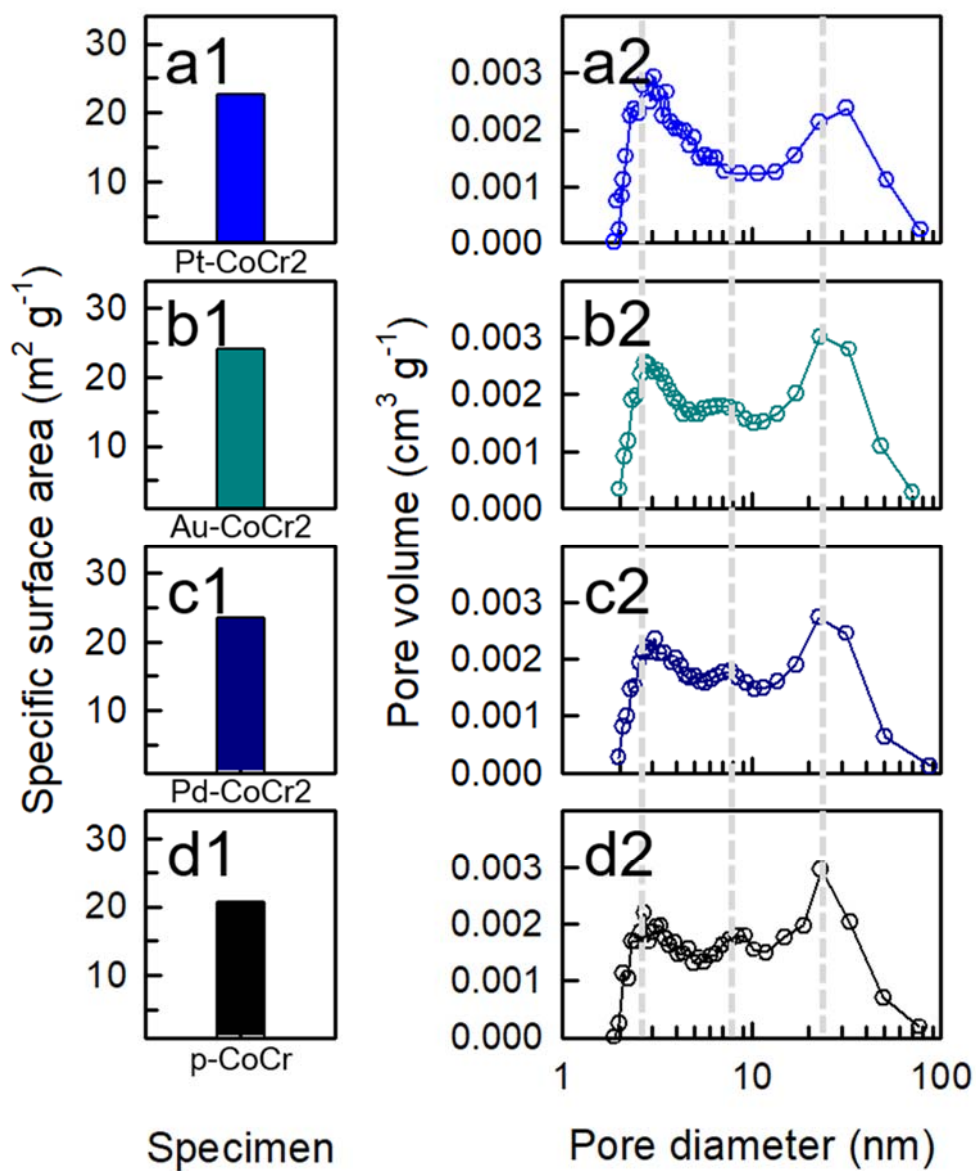

Figure S7. (a1-d1) BET specific surface areas and (a2-d2) pore size distributions of (a) Pt-CoCr, (b) Au-CoCr, (c) Pd-CoCr, and (d) p-CoCr hollow spheres.

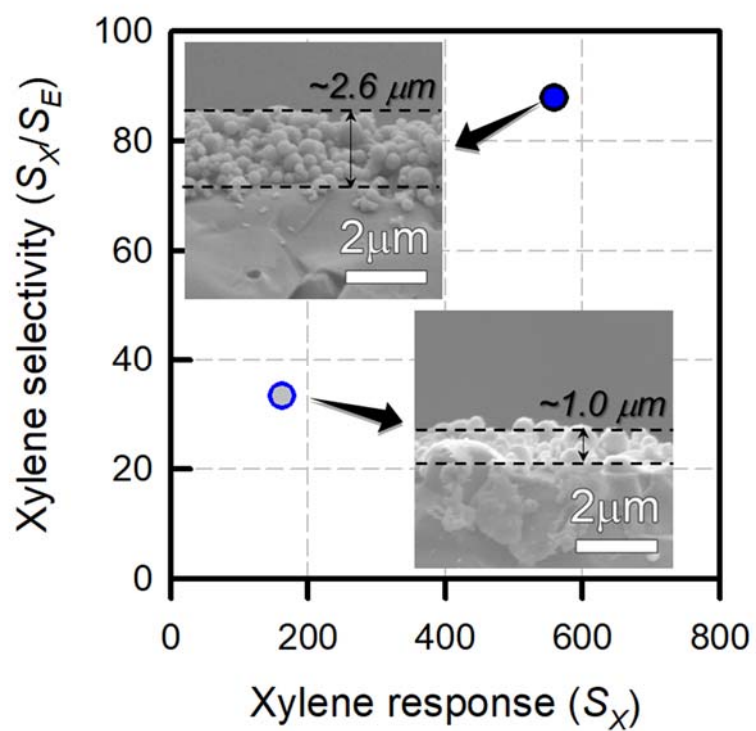

Figure S8. (a) Xylene selectivity ( $S_X/S_E$ ) and (b) response ( $S_X$ ) of Pt-CoCr depending on the sensing film thickness.

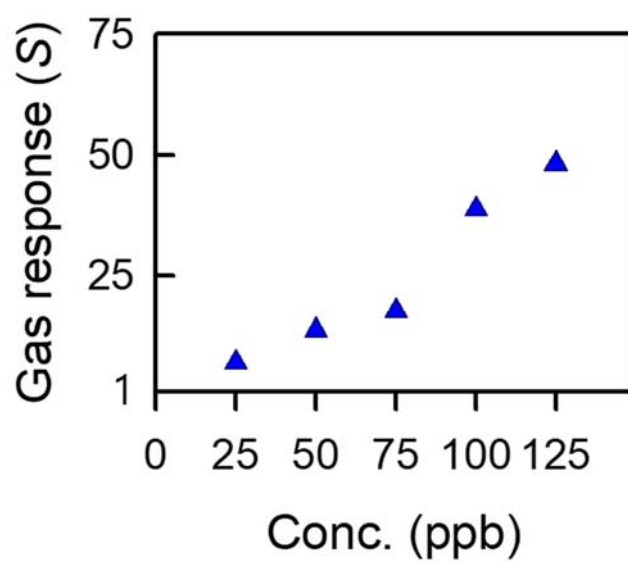

Figure S9. Gas responses of Pt-CoCr sensor to 25 – 125 ppb of xylene at 275°C under the relative humidity of 80 %.

Table S1. The values of 5 ppm xylene selectivity ( $S_X/S_E$ ) and response ( $S_X$ ) in the present study compared to the reported values in the literature.<sup>1-13</sup>

| No. | Sensing materials                                                | Structure              | Temp. (°C) | Response ( $S_X$ ) | Selectivity ( $S_X/S_E$ ) | LOD (ppm) | Ref        |
|-----|------------------------------------------------------------------|------------------------|------------|--------------------|---------------------------|-----------|------------|
| 1   | Pt-CoCr <sub>2</sub> O <sub>4</sub>                              | Hollow                 | 275        | 558.8              | 87.8                      | 0.019     | This study |
| 2   | Pd-CoCr <sub>2</sub> O <sub>4</sub>                              | Hollow                 | 275        | 225.8              | 30.7                      |           | This study |
| 3   | Au-CoCr <sub>2</sub> O <sub>4</sub>                              | Hollow                 | 275        | 365.5              | 30.9                      |           | This study |
| 4   | CoCr <sub>2</sub> O <sub>4</sub>                                 | Hollow                 | 275        | 319.5              | 25.4                      |           | This study |
| 5   | CoCr <sub>2</sub> O <sub>4</sub> -Cr <sub>2</sub> O <sub>3</sub> | Hollow                 | 275        | 117.2              | 14.8                      | ≤ 0.25    | [1]        |
| 6   | Co <sub>3</sub> O <sub>4</sub>                                   | Hollow hierarchical    | 225        | 80                 | 7.5                       | ≤ 0.25    | [2]        |
| 7   | ZnCr <sub>2</sub> O <sub>4</sub>                                 | Hetero nanostructure   | 325        | 69.2               | 26.7                      | ≤ 0.25    | [3]        |
| 8   | NiMoO <sub>4</sub>                                               | Hierarchical           | 375        | 101.5              | 4.06                      | 0.02      | [4]        |
| 9   | Ni-doped ZnO                                                     | Nanowire               | 400        | 42.44              | 2.54                      | 0.04      | [5]        |
| 10  | Pd-loaded Co <sub>3</sub> O <sub>4</sub>                         | Yolk-shell             | 250        | 64.2               | 30.1                      | ≤ 0.25    | [6]        |
| 11  | Co <sub>3</sub> O <sub>4</sub>                                   | Hierarchical           | 150        | 37.9               | 1.18                      | ≤ 1       | [7]        |
| 12  | Cr-doped NiO                                                     | Hierarchical           | 400        | 11.61              | 4.48                      | ≤ 0,25    | [8]        |
| 13  | Pd-loaded Co <sub>3</sub> O <sub>4</sub>                         | Hierarchical           | 300        | 79.7               | 18.1                      | 0.2       | [9]        |
| 14  | Au-loaded WO <sub>3</sub> ·H <sub>2</sub> O                      | Nanocube               | 255        | 26.4               | 21.64                     | 0.2       | [10]       |
| 15  | Cr-loaded NiO                                                    | Core-shell             | 220        | 20.9               | ~ 10                      | 1         | [11]       |
| 16  | Co <sub>3</sub> O <sub>4</sub>                                   | Hierarchical nanosheet | 150        | 37.9               | 17.4                      | ≤ 1       | [12]       |
| 17  | Co <sub>3</sub> O <sub>4</sub>                                   | Flower                 | 150        | 38.7               | 11.18                     | ≤ 1       | [13]       |

## References

- 1 B.-Y. Kim, J.-W. Yoon, K. Lim, S. H. Park, J.-W. Yoon and J.-H. Lee, *J. Mater. Chem. C*, DOI: 10.1039/C8TC04166K.
- 2 Y.-M. Jo, T.-H. Kim, C.-S. Lee, K. Lim, C. W. Na, F. Abdel-Hady, A. A. Wazzan and J. H. Lee, *ACS Appl. Mater. Interfaces*, 2018, **10**, 8860.
- 3 J.-H. Kim, H.-M. Jeong, C. W. Na, J.-W. Yoon, F. Abdel-Hady, A. A. Wazzan and J. H. Lee, *Sens. Actuators B*, 2016, **235**, 498.
- 4 B.-Y. Kim, J. H. Ahn, J.-W. Yoon, C.-S. Lee, Y. C. Kang, F. Abdel-Hady, A. A. Wazzan and J.-H. Lee, *ACS Appl. Mater. Interfaces*, 2016, **8**, 34603.
- 5 H.-S. Woo, C.-H. Kwak, J.-H. Chung and J.-H. Lee, *Sens. Actuators B*, 2015, **216**, 358.
- 6 J.-W. Yoon, Y. J. Hong, G. D. Park, S.-J. Hwang, F. Abdel-Hady, A. A. Wazzan, Y. C. Kang and J.-H. Lee, *ACS Appl. Mater. Interfaces*, 2015, **7**, 7717.
- 7 K. Xu, J. Zou, S. Tian, Y. Yong, F. Zeng, T. Yu, Y. Zhang, X. Jie and C. Yuan, *Sens. Actuators B*, 2017, **246**, 68.
- 8 H.-J. Kim, J.-W. Yoon, K.-I. Choi, H. W. Jang, A. Umar and J.-H. Lee, *Nanoscale*, 2013, **5**, 7066.
- 9 S.-J. Hwang, K.-I. Choi, J.-W. Yoon, Y. C. Kang and J.-H. Lee, *Chem. Eur. J.*, 2015, **21**, 5872.
- 10 F. Li, S. Guo, J. Shen, L. Shen, D. Sun, B. Wang, Y. Chen and S. Ruan, *Sens. Actuators B*, 2017, **238**, 364.
- 11 J. Cao, Z. Wang, R. Wang and T. Zhang, *CrystEngComm*, 2014, **16**, 7731.
- 12 K. Xu, J. Zou, S. Tian, Y. Yang, F. Zeng, T. Yu, Y. Zhang, X. Jie and C. Yuan, *Sens. Actuators B*, 2017, **246**, 68.

13 K. Xu, L. Yang, J. Zou, Y. Yang, Q. Li, Y. Qu, J. Ye and C. Yuan, *J. Alloys Compd.* 2017, **246**,

68.
